EDITORIAL NOTE

## Editorial Note: Predicting corporate credit risk: Network contagion via trade credit

The *PLOS One* Editors

### Notice of Republication

This article [1] was republished on April 3, 2026, to address an issue involving the published peer review history. The article content has not been changed.

### Reference

1. Berloco C, De Francisci Morales G, Frassinetti D, Greco G, Kumarasinghe H, Lamieri M, et al. Predicting corporate credit risk: Network contagion via trade credit. *PLoS One*. 2021;16(4):e0250115. <https://doi.org/10.1371/journal.pone.0250115> PMID: [33914764](https://pubmed.ncbi.nlm.nih.gov/33914764/)

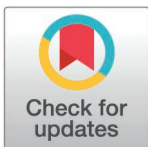

---

### OPEN ACCESS

**Citation:** The *PLOS One* Editors (2026) Editorial Note: Predicting corporate credit risk: Network contagion via trade credit. *PLoS One* 21(4): e0347629. <https://doi.org/10.1371/journal.pone.0347629>

**Published:** April 21, 2026

**Copyright:** © 2026 The *PLOS One* Editors. This is an open access article distributed under the terms of the [Creative Commons Attribution License](https://creativecommons.org/licenses/by/4.0/), which permits unrestricted use, distribution, and reproduction in any medium, provided the original author and source are credited.
